# Supplementary material for: Technical note: Quantified organic aerosol subsaturated hygroscopicity by a simple optical scatter monitor system through field measurements
Source: Copernicus journal article supplement (doi:10.5194/egusphere-2024-1390), 2024-07-11
Supplement: Supplementary file [file egusphere-2024-1390-AC1-supplement.pdf]

## Reply to Referee #2

### General comments:

This manuscript presents and discusses results obtained via a relatively low-cost method for quantifying the hygroscopicity of organic aerosol. Two pDRs (a single wavelength nephelometer-like instrument) are operated along with an AMS to estimate the mass of water taken up by submicron organic aerosol particles. By assuming a density of the organics (among other assumptions), the hygroscopicity of the organics ( $K_{OA}$ ) is estimated.  $K_{OA}$  is evaluated and discussed in the context of O:C ratio as well as for air masses of different origin.

Overall the paper is easy to follow and concise. The analysis is enjoyable to read. It is suitable for publication in ACP, and there are just a handful of assumptions that I would like to see discussed and/or explained in greater detail.

**R: We sincerely thank the reviewer for his/her thorough and thoughtful comments that helped improve our manuscript substantially. We have read all comments carefully and have responded to them each in turn. Below are our point-by-point responses to reviewer #2 comments. Author responses are in bold black. Modifications to the manuscript are in normal front. Line numbers in the response correspond to those in the revised manuscript text file (tracked version).**

### Specific comments:

**#1.** Line 91 - I was a bit surprised to see 45% RH used as a "dry" humidity where the  $pDR_{dry}$  and  $pDR_{wet}$  were compared (well, really just < 45% conditions... but RH is not measured below this value). I know of a few organic acids that do not display deliquescence and gradually take up water with increasing RH (e.g., Pope et al., 2010), and there are likely other organics I am not aware of. Do you have a reason to believe <45% RH was sufficient for the comparison you were after? Was the composition mostly dominated by inorganic species that would deliquesce at RH values > 45%? Perhaps you might want to discuss this possibility for organics to take up a certain amount of water with increasing RH and how that may affect this comparison between the pDRs.

**R: Thank you so much for this comment. The RH in  $pDR_{dry}$  during the deployment is generally between 30% to 45%, and we used 45% as the upper RH point for the self-calibration in this modified version with the ISORROPIA II calculation showing all these points with RH below 45% with an ALWIOA being 0. Meanwhile, previous HTDMA studies indicate that submicron, internally mixed inorganic-organic particles do not exhibit hygroscopic growth until they reach their deliquescence point at approximately 77% RH (Jing et al., 2016; Bouzidi et al., 2020; Pope et al., 2010). Therefore, we consider 45% to be a safe value for conducting self-calibration comparisons between  $pDR_{dry}$  and  $pDR_{wet}$ . We updated the text, as “During the deployment, the RH in  $pDR_{dry}$  ranged between 30% and 45%.**

We used 45% as the upper RH threshold for self-calibration, based on the following considerations: (1) ISORROPIA II model calculations indicate that aerosol liquid water associated with inorganics ( $ALW_{IOA}$ ) is zero for all data below 45% RH, and (2) submicron internally mixed inorganic-organic particles do not exhibit hygroscopic growth until they reach their deliquescence point, which occurs at approximately 77% RH (Pope et al., 2010; Jing et al., 2016; Bouzidi et al., 2020).” (Line 105-109)

#2. Line 101 - I'm unfamiliar with the pDR and would appreciate a bit more discussion. I see that it uses 880 nm as the wavelength. That's pretty high considering that you are interested in using it to study the hygroscopicity of submicron particles, right? Furthermore, it seems that the instrument was originally calibrated with Arizona Road Dust, which sounds like it would consist of relatively large particles (mostly > 1 $\mu$ m?), although that's just a guess/assumption I'm making. Anyway, due to the larger wavelength it would be great if you could briefly discuss the challenges and/or any previously determined competence of the pDR for analyzing submicron particles. Have results from the pDR ever been compared to those from a nephelometer operating at a comparable wavelength and size range of particles?

**R: Thank you so much for this comment. We added more information about pDR based on our previous studies, as well as our concerns/suggestions for using such kinds of nephelometer, as** “The calibration factor for the pDR, defined as the ratio of the aerosol mass concentration reported by the pDR to that of a reference instrument, was shown to be directly proportional to the relative scattering intensity calculated using Mie theory (Zhang et al., 2018), based on the lab tests for the mono-disperse particles (90nm, 173nm, 304nm, 490nm, 1030 nm of Polystyrene latex spheres (PSL) particles) and for the poly-disperse particles with four different chemical compositions ( $NaNO_3$ ,  $(NH_4)_2SO_4$ , sucrose, and adipic acid). Based on laboratory tests and ambient measurements, the pDR exhibited a unimodal distribution for its calibration factor, peaking around 500 nm. This peak was larger than that of another nephelometric monitor tested in parallel, the TSI DRX (operating at a 660 nm wavelength and 90° scattering angle), which peaked at 300–400 nm. The higher peak for the pDR is attributed to its use of a longer wavelength. However, the precise value of the calibration factor is further influenced by aerosol composition, which affects the refractive index and, consequently, the relative scattering intensity. These findings raise concerns about the calibration of widely used low-cost particle sensors based on single-wavelength nephelometric technology. Generally speaking, the relative scattering intensity, which will be proportional to the report aerosol mass concentration from these low-cost particle sensors, is influenced by particle size, composition, instruments properties (such as light wavelength and scattering angles), and ambient RH as a factor influencing ALW—an important focus of this study. It is challenging to apply simple calibration factors, derived from laboratory tests on specific aerosol species, to fully correct low-cost sensors. Additionally, the calibration factor for one type of monitor cannot simply be applied to another monitor with different properties (e.g., light wavelength and scattering angles). Addressing these limitations

will require further research and targeted calibration efforts specific to each monitor's characteristics.” (Line 124-141)

#3. Fig. 1: Small thing, but it says "calibrate factor" in the figure, whereas in the text it is always referred to as "calibration factor." I suggest being consistent if you can!

**R: Thank you so much for this comment. We corrected it to calibration factor, as:**

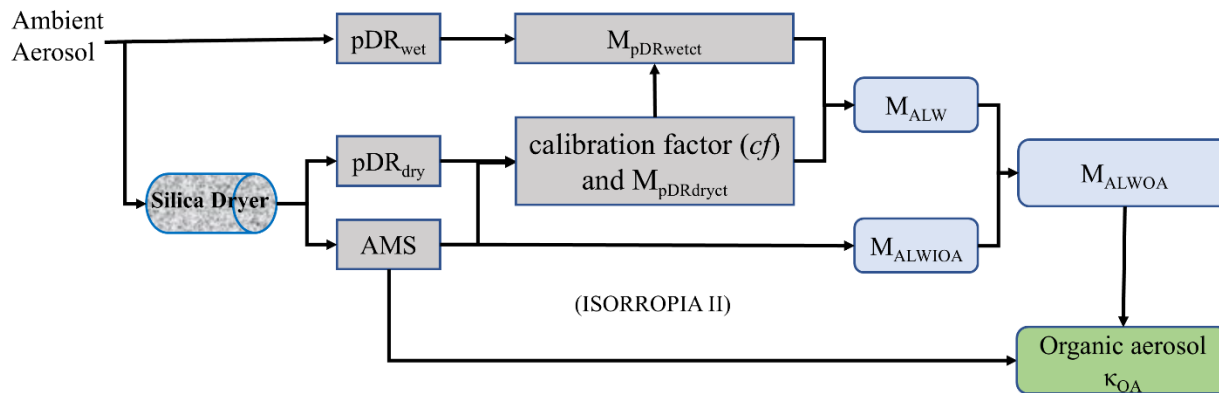

#4. Line 127 - I am trying to wrap my brain around the application of the fine mode calibration factor (determined by the ratio of masses measured by the pDR<sub>dry</sub> and AMS) to the dry and wet pDR mass concentrations. Maybe a bit more discussion would help me (and potentially others). The calibration factor is based on a difference in dry aerosol mass between the pDR and the AMS, which will most likely have a density > 1 g cm<sup>-3</sup> and refractive index greater than 1.33. However, it sounds like much of the mass measured by the pDR<sub>wet</sub> can come from water, which has a lower density (1 g cm<sup>-3</sup>) and refractive index (1.33) than most dry aerosol components. I'm curious if the calibration factor is robust in situations when much of the mass measured by the pDR<sub>wet</sub> is from water? I understand you need some way to correct pDR<sub>wet</sub>, but maybe you could discuss how the calibration factor is based on dry aerosol and may not apply perfectly when needing to correct a mass measurement (from pDR<sub>wet</sub>) that is potentially largely composed of water. And if it is not as big of a deal as I am making it please help me understand why, thanks.

**R: Thank you so much for this comment, and sorry for the unclear caused by the incomplete information provided in the previous version. We added more information to describe this, as:**

“Furthermore, it was demonstrated that the calibration factor was almost independence to the aerosol wet/dry conditions, and was minimally affected by RH variations within the range of 45 to 95%, maintaining an accuracy with an error margin of less than 5%. This is due to the minimal variation in relative scattering intensity caused by aerosol in this RH range, after considering the

influence of ALW. It should be noted that a minimally affected calibration factor means that the ratio of the dry aerosol calibrated mass concentration to the monitor-reported value at 45% RH is very similar to the ratio of the wet aerosol calibrated mass concentration to the monitor-reported value at 95% RH. However, the values for wet aerosol—both the calibrated mass concentration and the monitor-reported value—will be larger than those for dry aerosol due to the presence of aerosol liquid water (ALW) under higher humidity conditions, with further discussed in more detail below using pDR as an example.” (Line 142-150)

**And**

“The difference between  $M_{pDRwetc}$  and  $M_{pDRdryc}$  is attributed to ALW, based on the consideration that the only increasement for the dry aerosol under high RH would be the concentration of the water being absorbed ( $M_{ALW}$ ). Here the cf, obtained from the ratio of  $M_{pDRdry}$  to  $M_{AMS}$ , was applied to determine the calibrated mass concentration of the wet aerosol ( $M_{wet}=M_{AMS}+M_{ALW}$ ), given that the calibration factor being almost independence to the aerosol wet/dry conditions as described above, as shown in Eq.(2),

$$cf = \frac{M_{pDRdry}}{M_{AMS}} = \frac{M_{pDRwet}}{M_{wet}} \quad (2)$$

Here  $M_{wet}$  is the calibrated mass concentration of the wet aerosol ( $M_{wet}=M_{AMS}+M_{ALW}$ ), and is  $M_{pDRwetc}$  in Eq. (1). ” (Line 174-181)

#5. Line 136 - I see that you assume a single density for the organic species. I understand you have to assume a density because you do not have size-resolved information about your submicron organic aerosols. As you showed in your study, properties of organic aerosol can be largely different depending on the source, and I'm sure organic densities are subject to this variation (don't have citations off the top of my head, but I'm sure they are out there). Perhaps you can at least mention the organic density likely spanned a range and explain why you chose  $1.4 \text{ g cm}^{-3}$  (i.e., at least provide a citation as I don't believe there is one now).

**R: Thank you so much for this comment. We added more discussion about this, as** “In this study, we used  $1.4 \text{ g cm}^{-3}$  for  $\rho_{OA}$  following the commonly used value (Hallquist et al., 2009; Shakya and Griffin, 2010; Nguyen et al., 2016; Riva et al., 2017; Jiang et al., 2019). However, the  $\rho_{OA}$  can vary significantly depending on the sources and formation pathways of organic aerosols, with a range between  $1.2$  and  $1.6 \text{ g cm}^{-3}$  based on a recent chamber study (El Mais et al., 2023), introducing some uncertainty into our results.” (Line 191-195)

#6. Line 149-152 - I was a little confused by this stated assumption: "By simply assuming a constant mass ratio for the chemical composition of fine-mode and coarse-mode particles, the

ratio of MALW associated with fine-mode particles to that associated with coarse-mode particles will correspond to the dry aerosol mass concentration of each mode."

Perhaps I am not following, but I thought this study was focused solely on submicron mass because the pDR\_dry mass is corrected to be equal that measured by the AMS, which is certainly submicron. And then pDR\_wet is also corrected by that same correction factor, although the pDR\_wet understandably samples up to 2.5 microns to be able to capture the hygroscopic growth of dry submicron particles (sampled by the pDR\_dry and AMS). So how would the coarse mode be represented in this study? I was thinking it got "corrected out" by aligning everything to the AMS mass...

Second, this assumption makes me nervous: "the ratio of MALW associated with fine-mode particles to that associated with coarse-mode particles will correspond to the dry aerosol mass concentration of each mode."

I would expect the fine and coarse mode to take up water differently, largely because they are typically composed of different chemical components. For example, see Fig. 10B in AzadiAghdam et al. (2019), where derived kappa values are not consistent with particle size and are largely sensitive to the presence of sea salt and certain inorganic species, which are typically found in varying amounts between the fine and coarse mode.

That all being said, can you provide more insight into why you believe the assumption you are making is a good one? What is it founded upon? Can you provide a reference or justification? Thanks.

**R: Thank you so much for this comment. We rewrote it to make it more clear, as well as highlighting the large uncertainty introduced, as** “The basic assumption here is the chemical composition of the coarse and fine modes is similar to each other throughout the study (Sun et al., 2020), and the ratio of particle water in the fine and coarse modes will equal the ratio of fine and coarse mode dry mass concentration. So that, the estimated  $M_{ALW}$  here based on the calibrated aerosol mass concentration from the pDRs using AMS as reference can represent the liquid water in non-refractory  $PM_{1.0}$ . However, significant uncertainty will be introduced in the estimation of  $\kappa_{OA}$ , particularly due to the presence of sea salt and other high- $\kappa$  refractory components in coarse aerosols (AzadiAghdam et al. (2019)), which can greatly increase their hygroscopicity. Due to the limited information on the chemical composition (including refractory components) of fine and coarse aerosols, we can only provide a rough estimate of this uncertainty as a bulk, as shown below.” **(Line 208-216)**

#7. Line 189 - Small thing, but it would be clearer for me if you explicitly wrote "percentile" with the [25%-75%] or some other explanation for what this range is referring to.

**R: Thank you so much for this comment. We rewrote it, as “a range of 15% to 39% within the 25th to 75th percentiles of the dataset.” (Line 280-281)**

#8. Line 196-197 - I was curious about your categorization of the different HYPPLIT back-trajectories. Was this totally subjective or was there more of a process to it? I ask since the lowest-level back-trajectory (red line) on 06 July 2023 in Fig. S3 appears to stay near large metropolitan areas for much of the time before eventually moving out into a more (relatively) rural part of New York. I'm just curious if back-trajectories heading in the northwest direction (or from over the Atlantic Ocean as in panel for 25 August 2023) from the measurement site were considered rural no matter what or if there were more criteria to the classifications?

**R: Thank you so much for this comment. We sperate these three different groups based on the combination consideration of their back trajectories, mass concentration, as well as  $\kappa_{OA}$ , and updated the text, as “They were divided into three groups with different aerosol sources based on their similar back trajectories, mass concentration, as well as  $\kappa_{OA}$ ” (Line 293-294)**

#9. Line 279 - The fact that you were not able to calibrate with particles of known composition (and therefore known kappa values) seems like a big deal to me and significant limitation to the study, especially as you are trying to present an alternative and lower-cost method to what has been often used in the past. I find it interesting that the inability to calibrate was not mentioned until the Conclusions section. I would strongly suggest moving this information to the Methods section where you previously were discussing the various limitations associated with the proposed method (the paragraphs right before the Results and Discussion). I appreciate that you propose an alternative instrument set-up where the lab calibration would be possible.

**R: Really thank you so much for this comment. We proposed a potential design for this type of test, but it could not be realized in our lab at this time due to limited resources. Following your suggestion, we moved the design to the methods section, where we describe the instrument setup. We hope this will inspire other research groups to conduct lab tests to better quantify the uncertainty of this method for pDRs, as well as for other commonly used low-cost nephelometric monitors (e.g., Purple Air, Plantower PMS series, etc.) which will provide new insights for their applications. We added related information in the text, as “It is important to note that the derived  $\kappa_{OA}$  values in this study were not continuous, as we could only obtain them under high relative humidity (RH) conditions (85% to 90%). Additionally, our current inability to maintain aerosol under such high RH conditions limited the laboratory calibration and verification of this method using substances with known hygroscopic parameters (Fierz-Schmidhauser, et al., 2010; Zieger et al, 2013; Han et al., 2022), even though this method is theoretically feasible. To resolve this issue, one possible update of this system**

could be adding a humidifier system to the pDR to get wet aerosol with RH between 85% to 95%, and the possible set-up for humidifier system could include a Perma Pure MH-series humidifier, water pumps and tanks (red dash box in Figure 2). This will make this system more be similar to the widely used humidified nephelometer system (Guo, et al., 2015; Burgos et al., 2019, Fierz-Schmidhauser et al., 2010; Kuang et al., 2017,2018,2020, 2021).

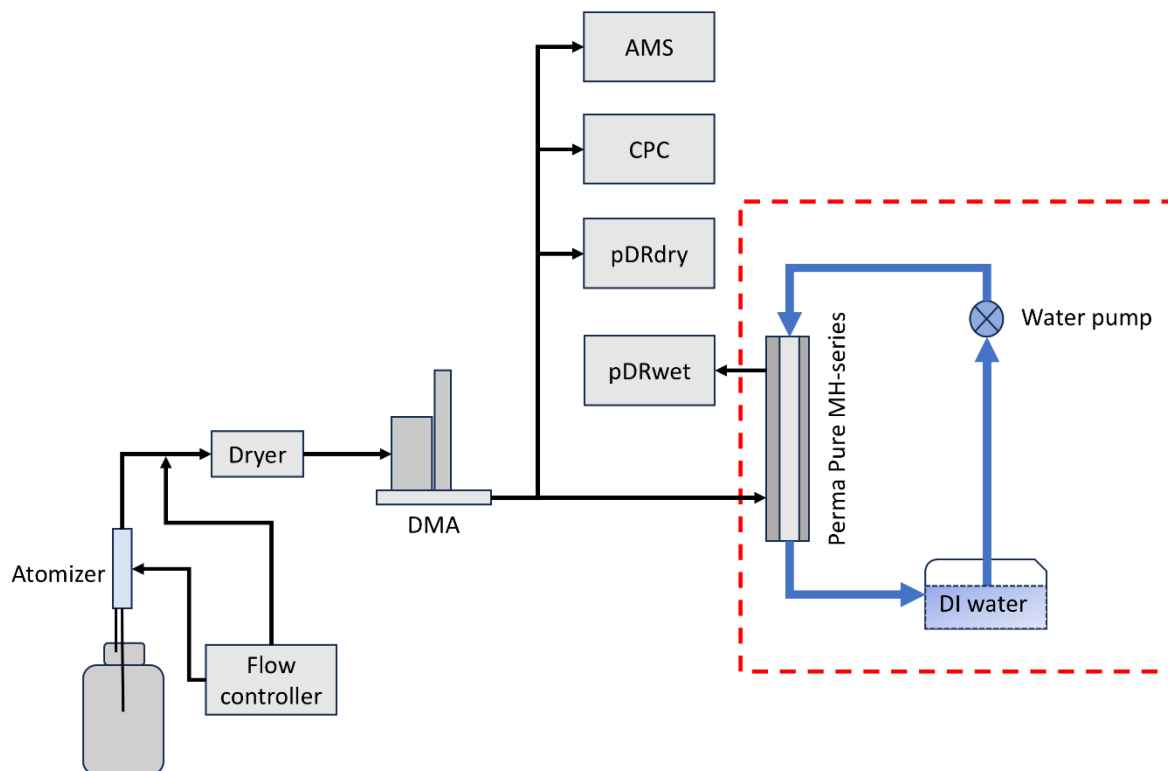

**Figure 2. proposed instrument setup for lab calibration**

The proposed instrument setup for lab calibration will include an atomizer to produce aerosol, which will be dried through the dryer. Then, the Differential Mobility Analyzer (DMA) will pick up different size of aerosols, with one of branch aerosol flow to the humidifier system to get wet and then to pDR<sub>wet</sub>, and another three branches of aerosol flows to pDR<sub>dry</sub>, AMS, and condensation particle counter (CPC). The substances/aerosol for testing will include the organic aerosols with known hygroscopic parameter (Han et al., 2022), the inorganic aerosols (i.e., (NH<sub>4</sub>)<sub>2</sub>SO<sub>4</sub>, Fierz-Schmidhauser et al., 2010), as well as their mixing solutions of organic and inorganic. Due to limited resources, this proposed instrument setup is not feasible at this moment, and the lab calibration is not included in this study. However, we hope this will inspire other research groups with this set-up to conduct these lab tests to better quantify the uncertainty of this method for pDRs. Given that the pDR is a type of single-wavelength nephelometric monitor, it's logical to consider that other brands commonly used low-cost nephelometric monitors (e.g., Purple Air, Plantower PMS series) might offer similar capabilities, and related lab test would be also highly recommended.” (Line 236-257)



#9. Also is "varication" supposed to be "verification" in Line 279?

**R: Thank you for this comment. We corrected it, and moved it to new section 2.3, as “It is important to note that the derived  $\kappa_{OA}$  values in this study were not continuous, as we could only obtain them under high relative humidity (RH) conditions (85% to 90%). Additionally, our current inability to maintain aerosol under such high RH conditions limited the laboratory calibration and verification of this method using substances with known hygroscopic parameters (Fierz-Schmidhauser, et al., 2010; Zieger et al, 2013; Han et al., 2022), even though this method is theoretically feasible.” (Line 236-240)**

#10. Citations for works mentioned above:

Pope, F. D., Dennis-Smith, B. J., Griffiths, P. T., Clegg, S. L., & Cox, R. A. (2010). Studies of single aerosol particles containing malonic acid, glutaric acid, and their mixtures with sodium chloride. I. Hygroscopic growth. *The Journal of Physical Chemistry A*, 114(16), 5335-5341.

AzadiAghdam, M., Braun, R. A., Edwards, E. L., Bañaga, P. A., Cruz, M. T., Betito, G., ... & Sorooshian, A. (2019). On the nature of sea salt aerosol at a coastal megacity: Insights from Manila, Philippines in Southeast Asia. *Atmospheric Environment*, 216, 116922.

**R: Thank you for these references. Both of them are cited in the revised version.**
